# Supplementary material for: Self-assembled network polymer electrolyte membranes for application in fuel cells at 250℃
Source: Research Square preprint supplement (doi:10.21203/rs.3.rs-829052/v1), 2021-09-07

**Extended Data Figure 1**

**
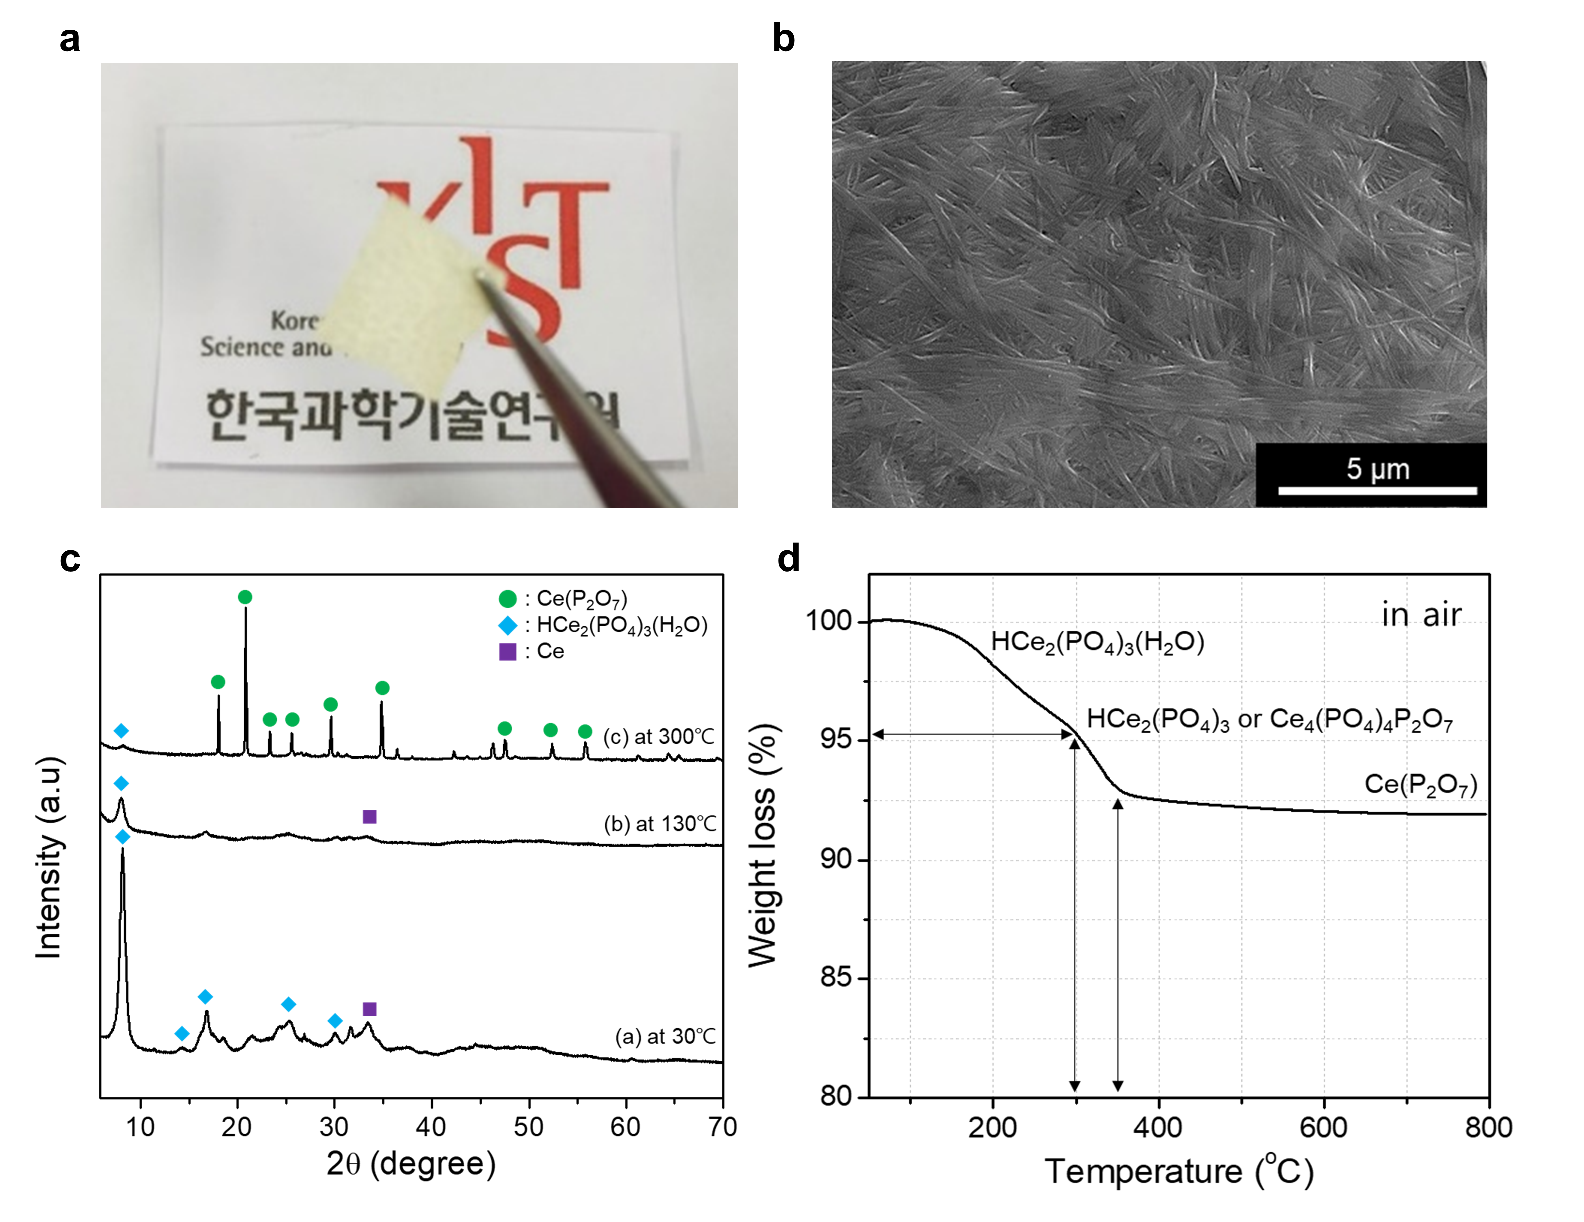
**

**Extended Data Figure 2**

**
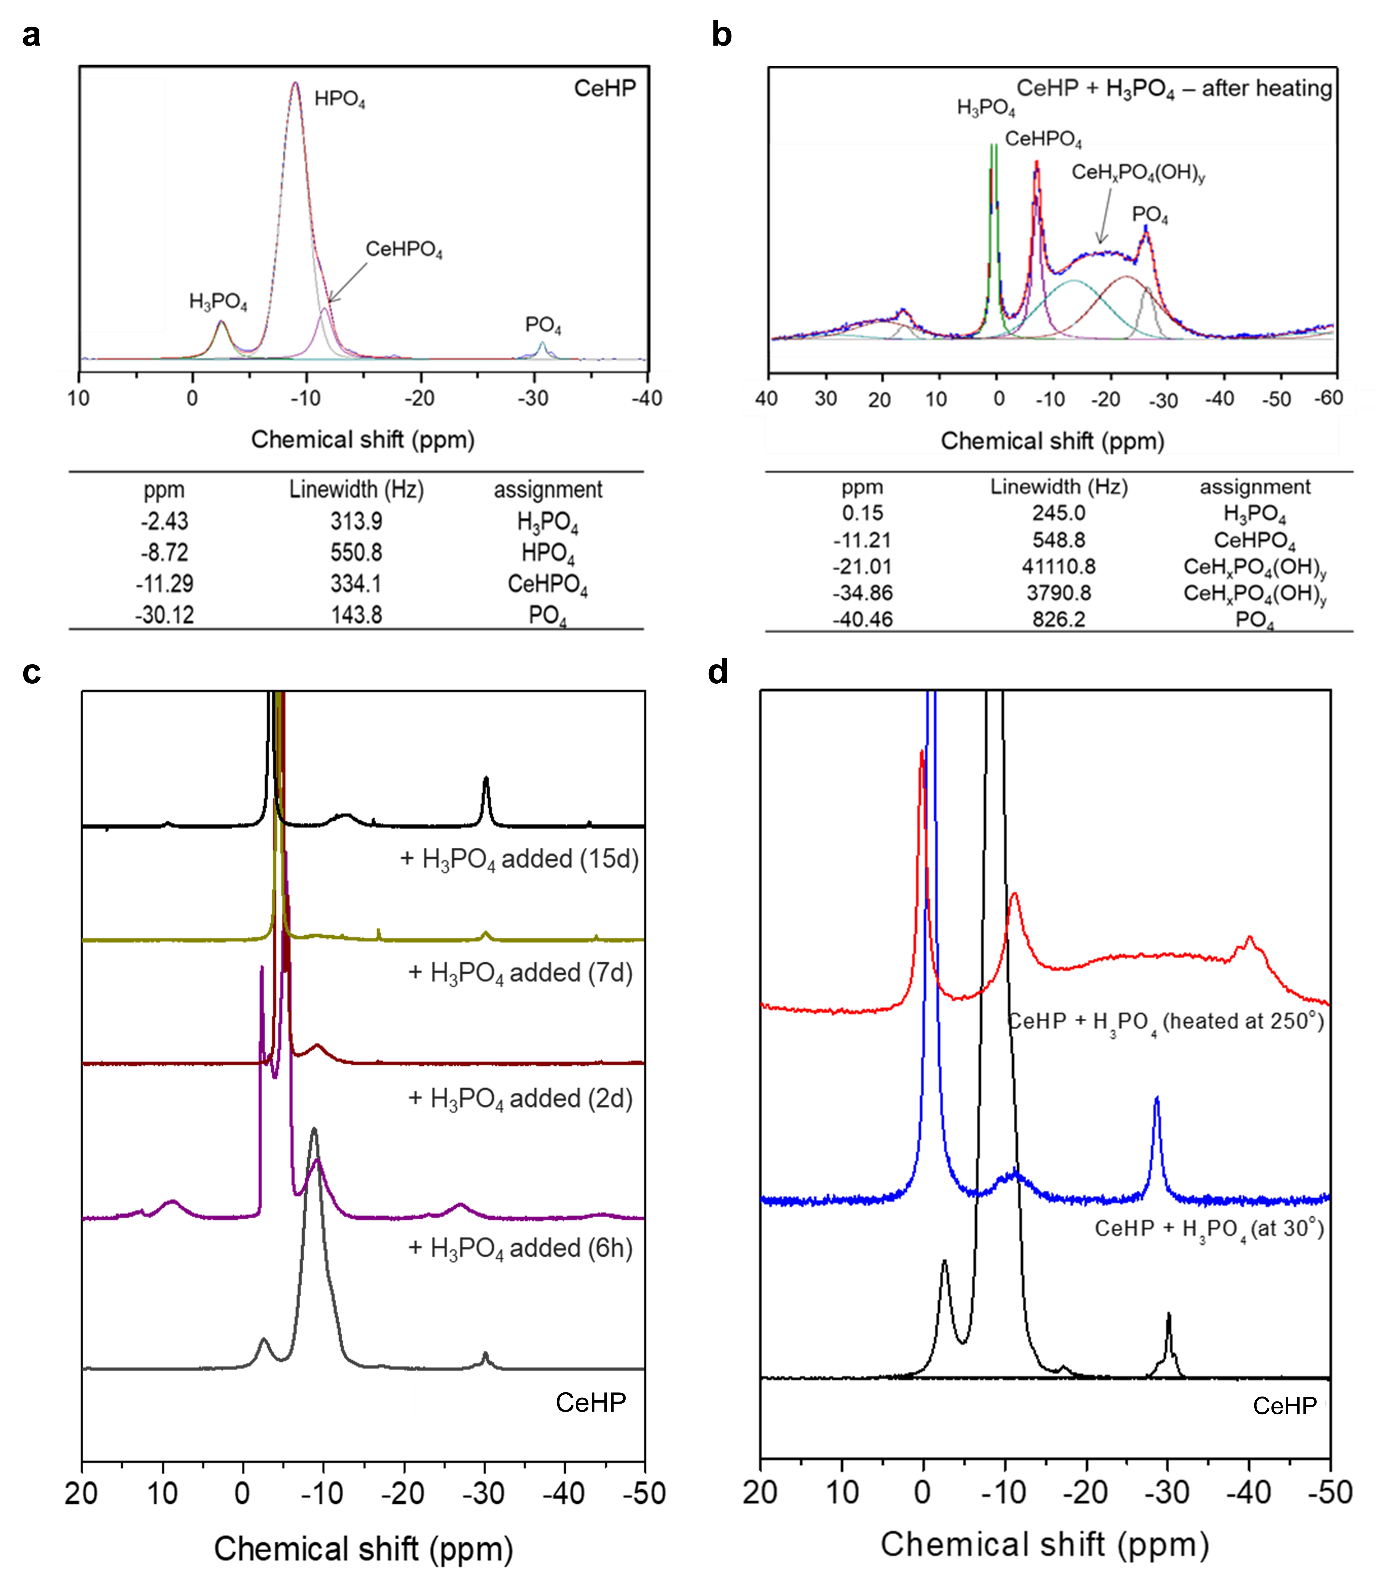
**

**Extended Data Figure 3**

**
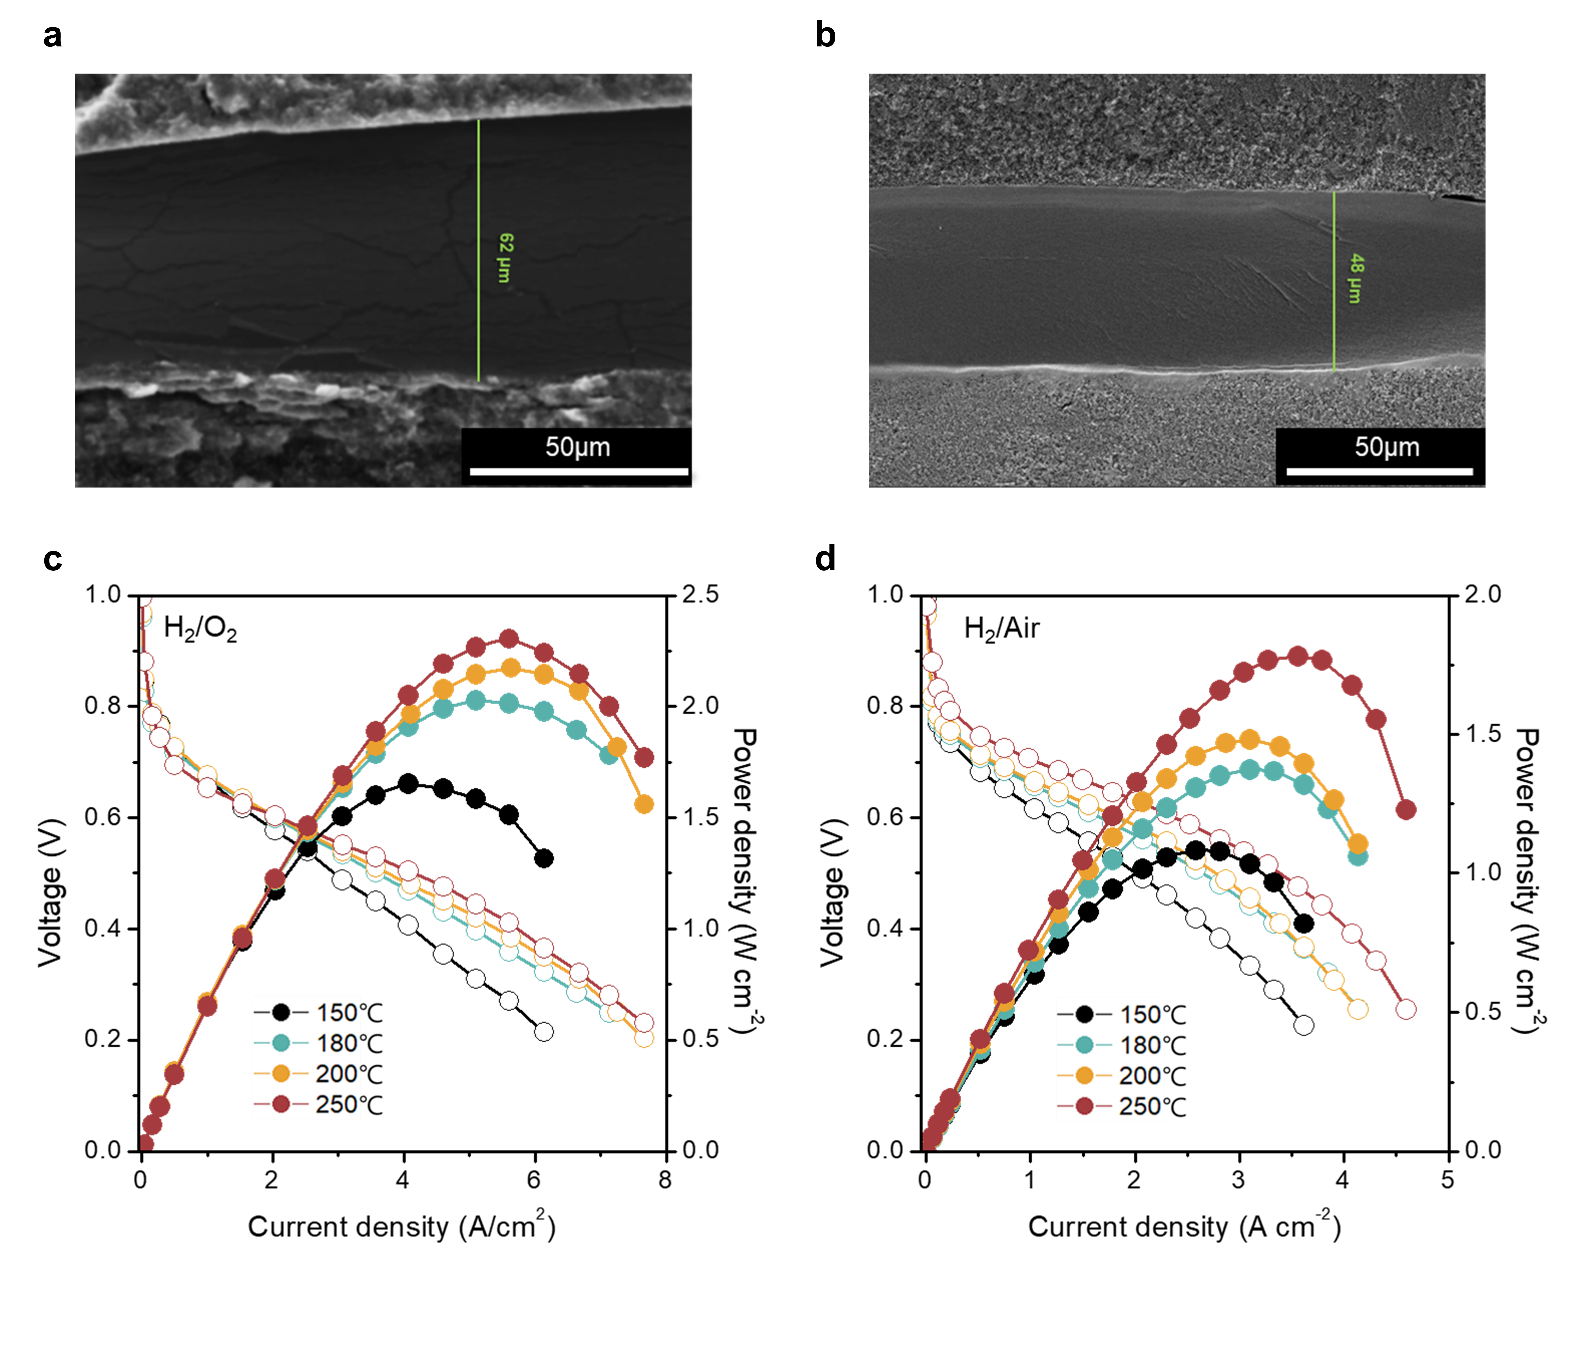
**

**Extended Data Figure 4**


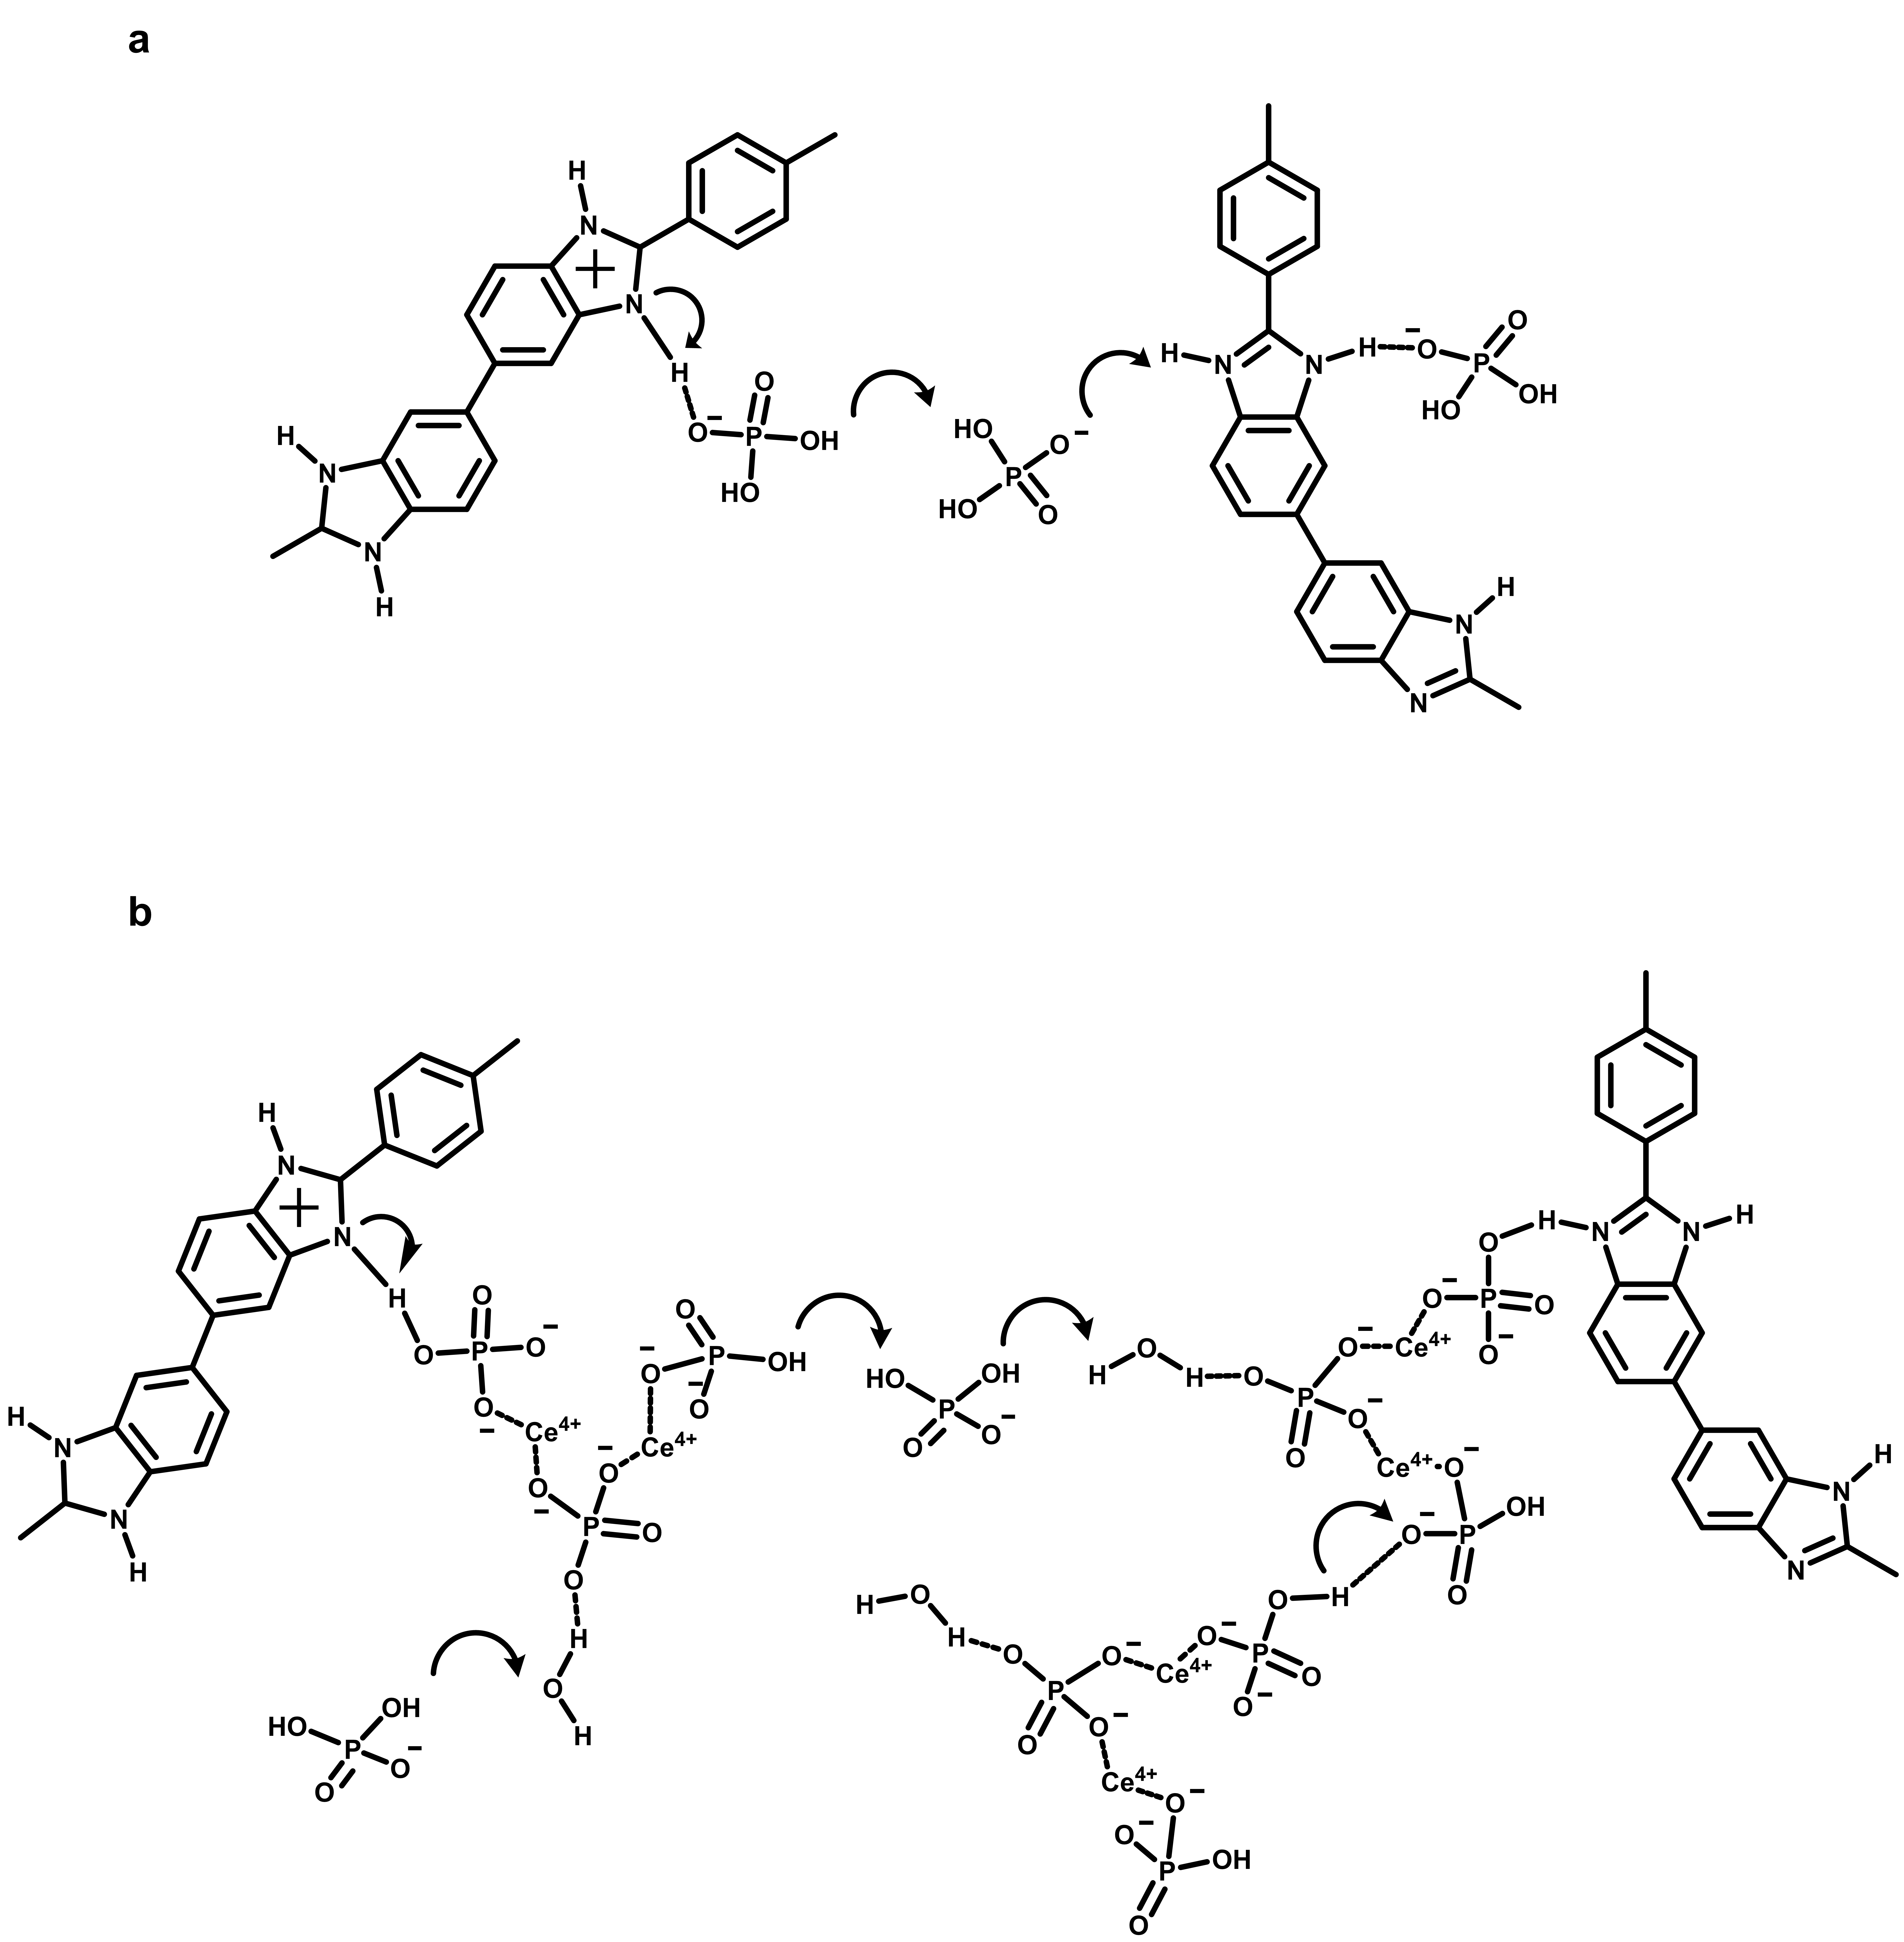


**Extended Data Figure 5**


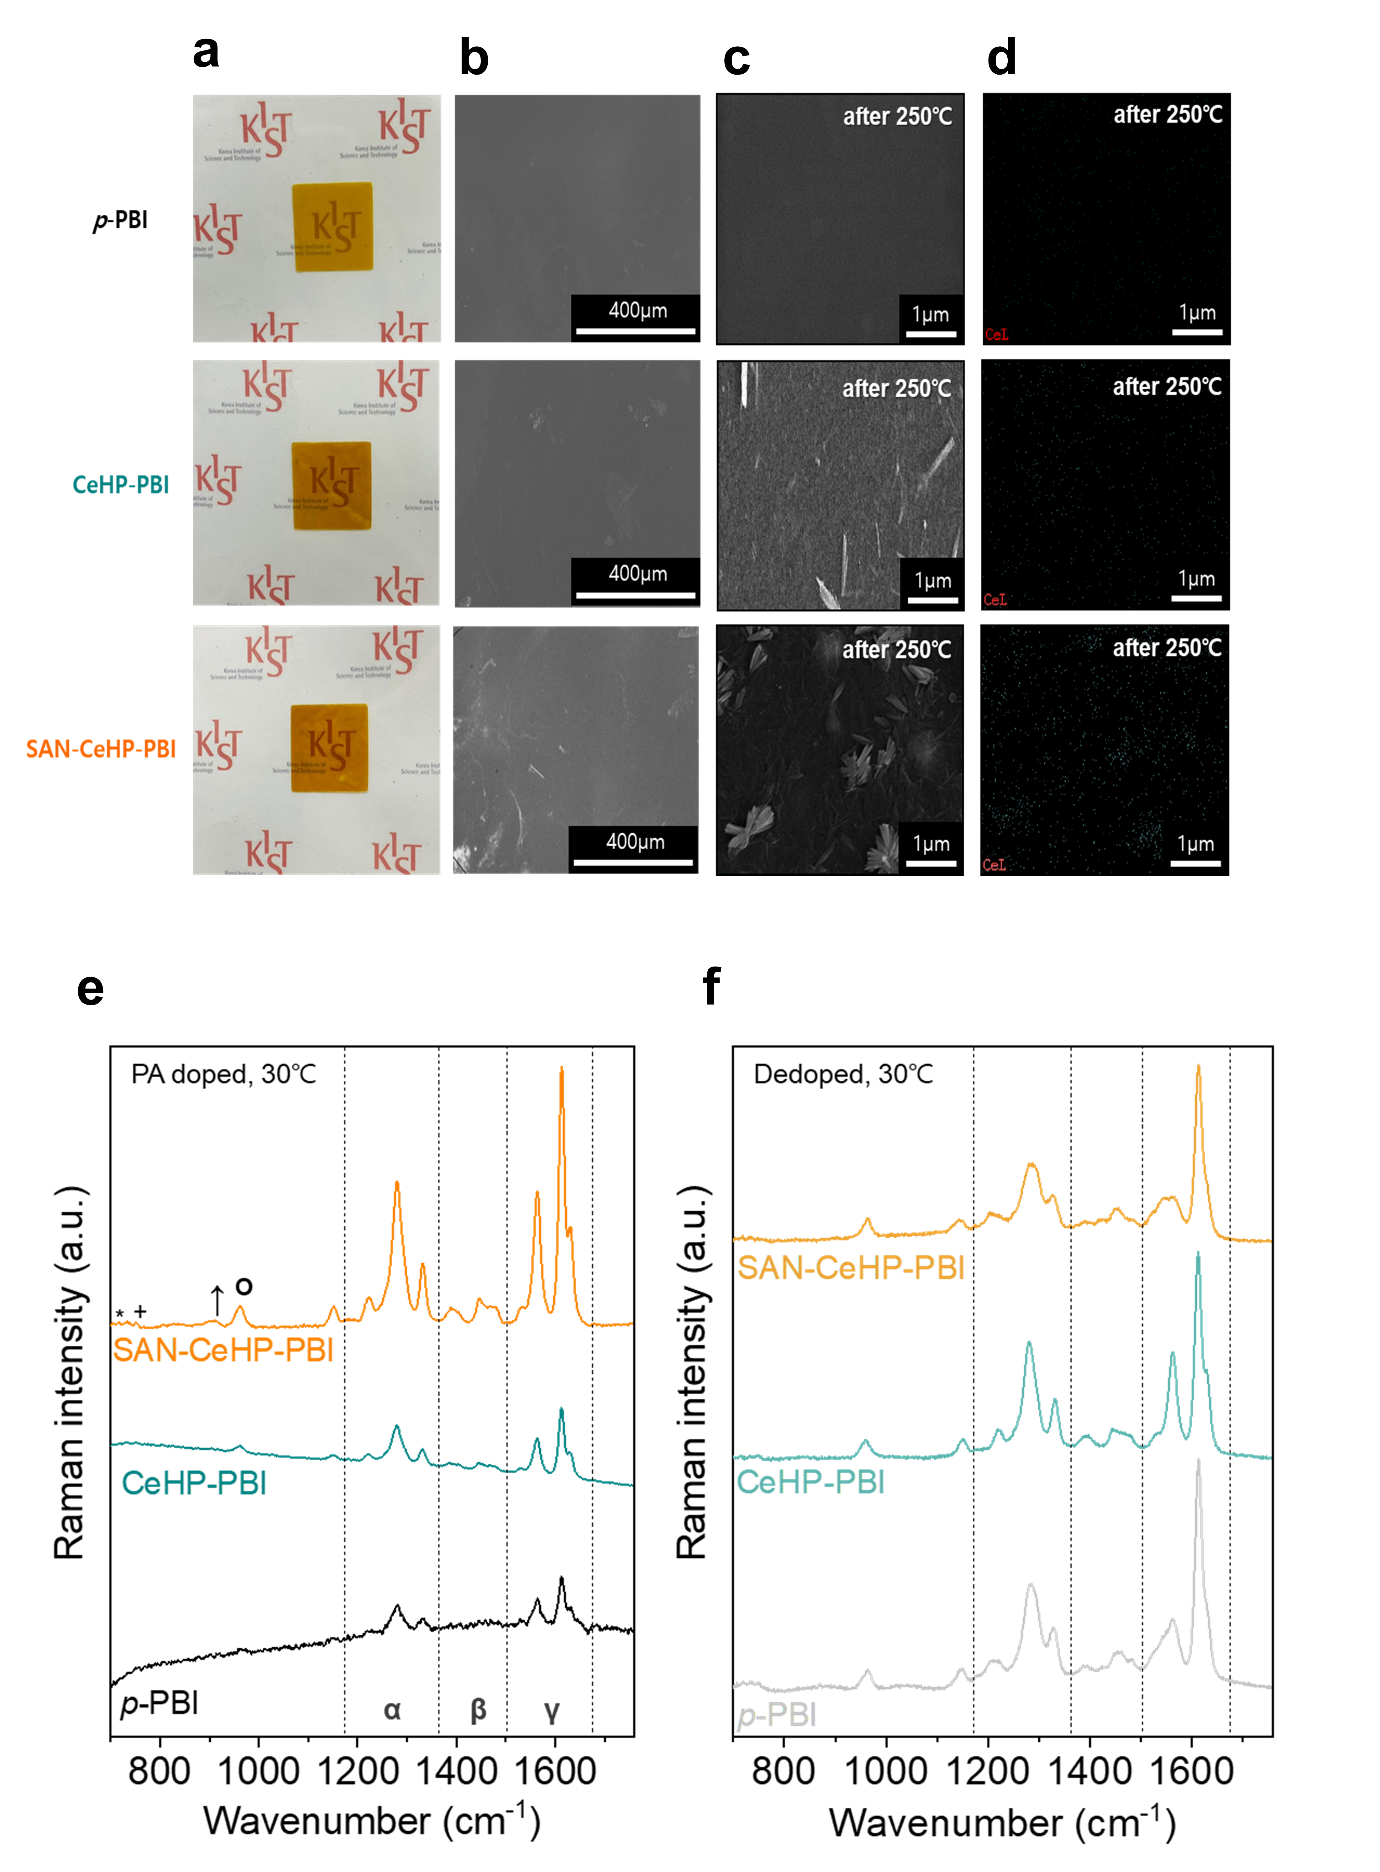


**Extended Data Figure 6**


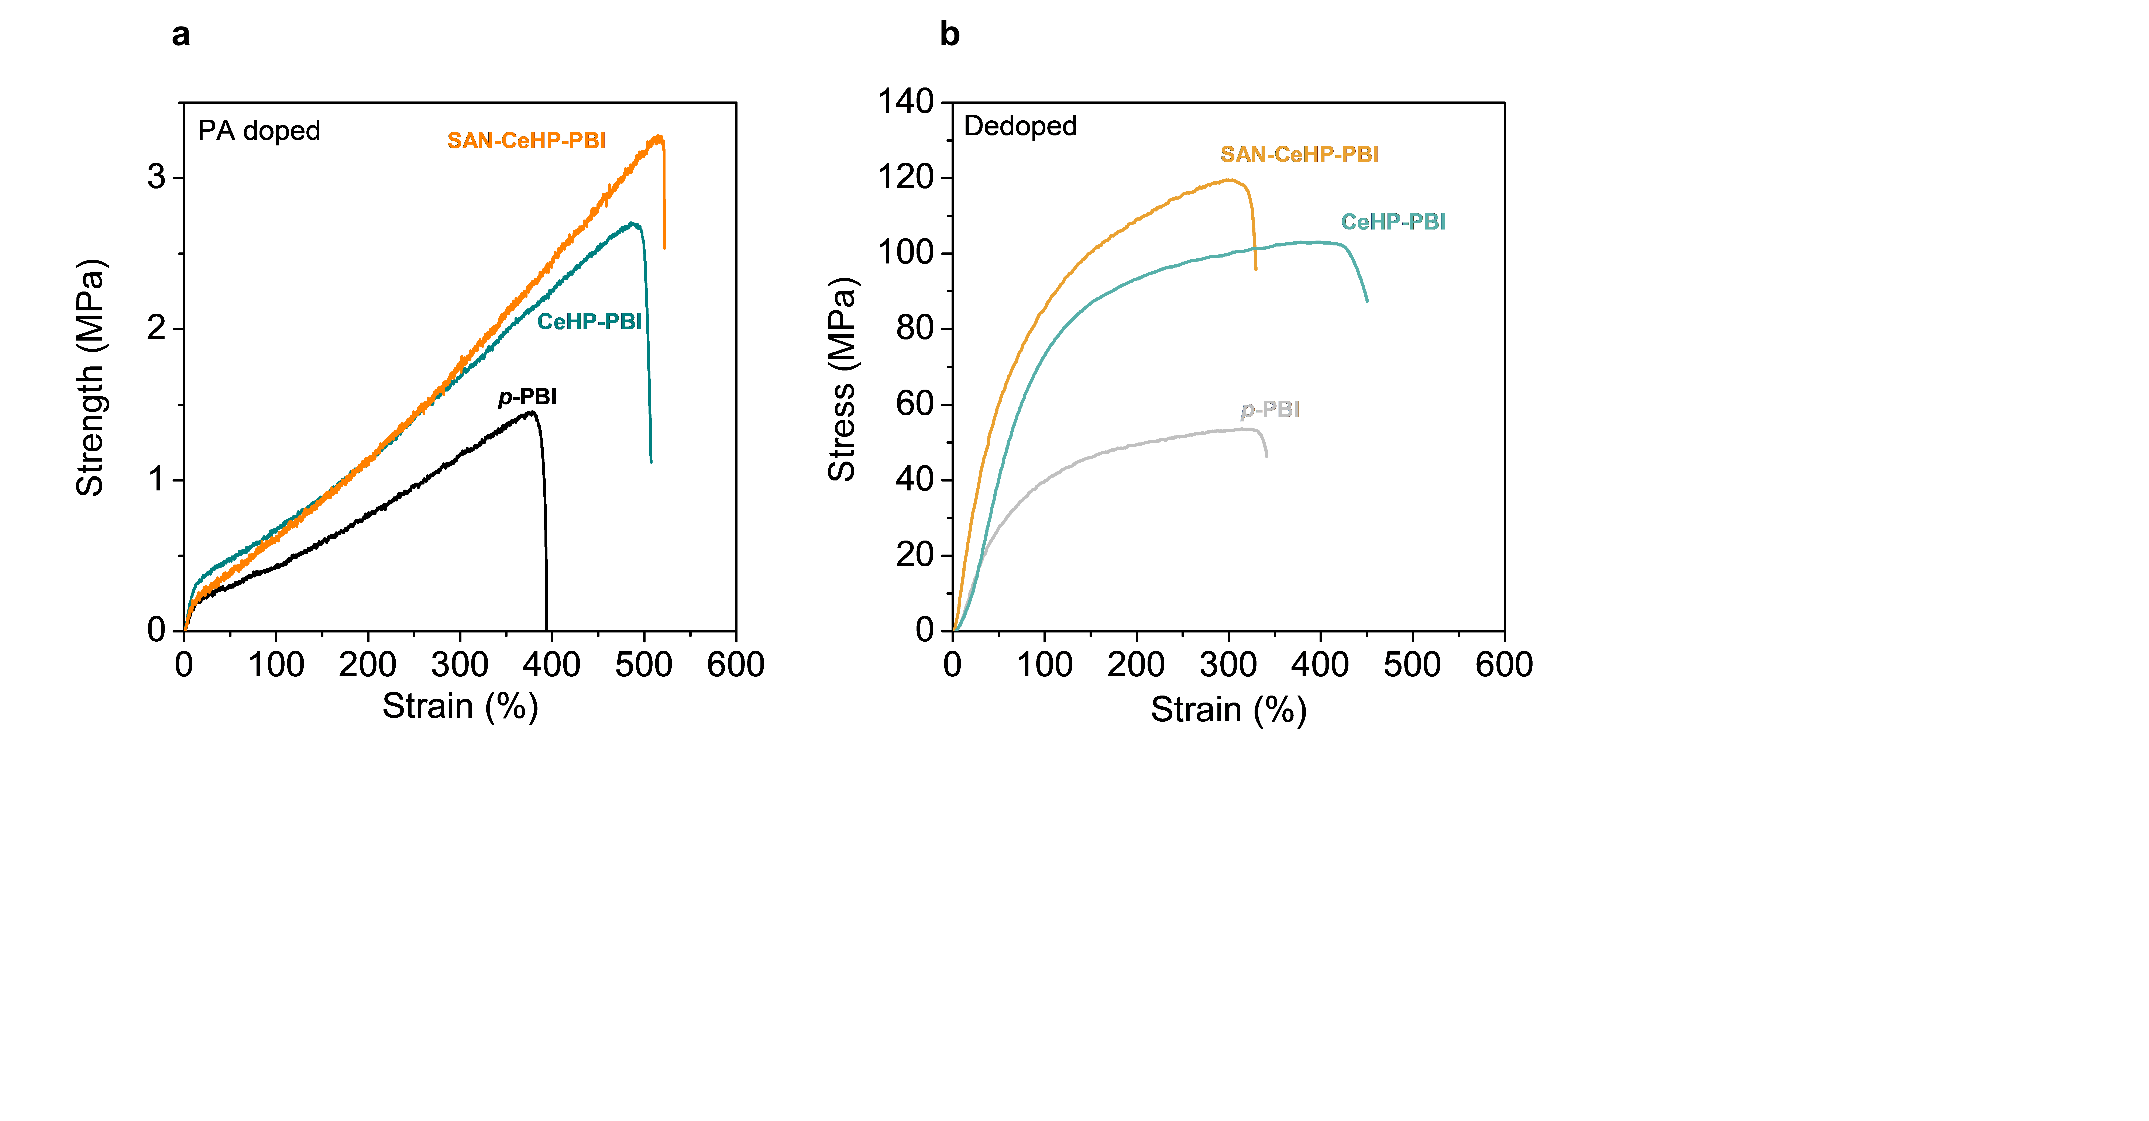


**
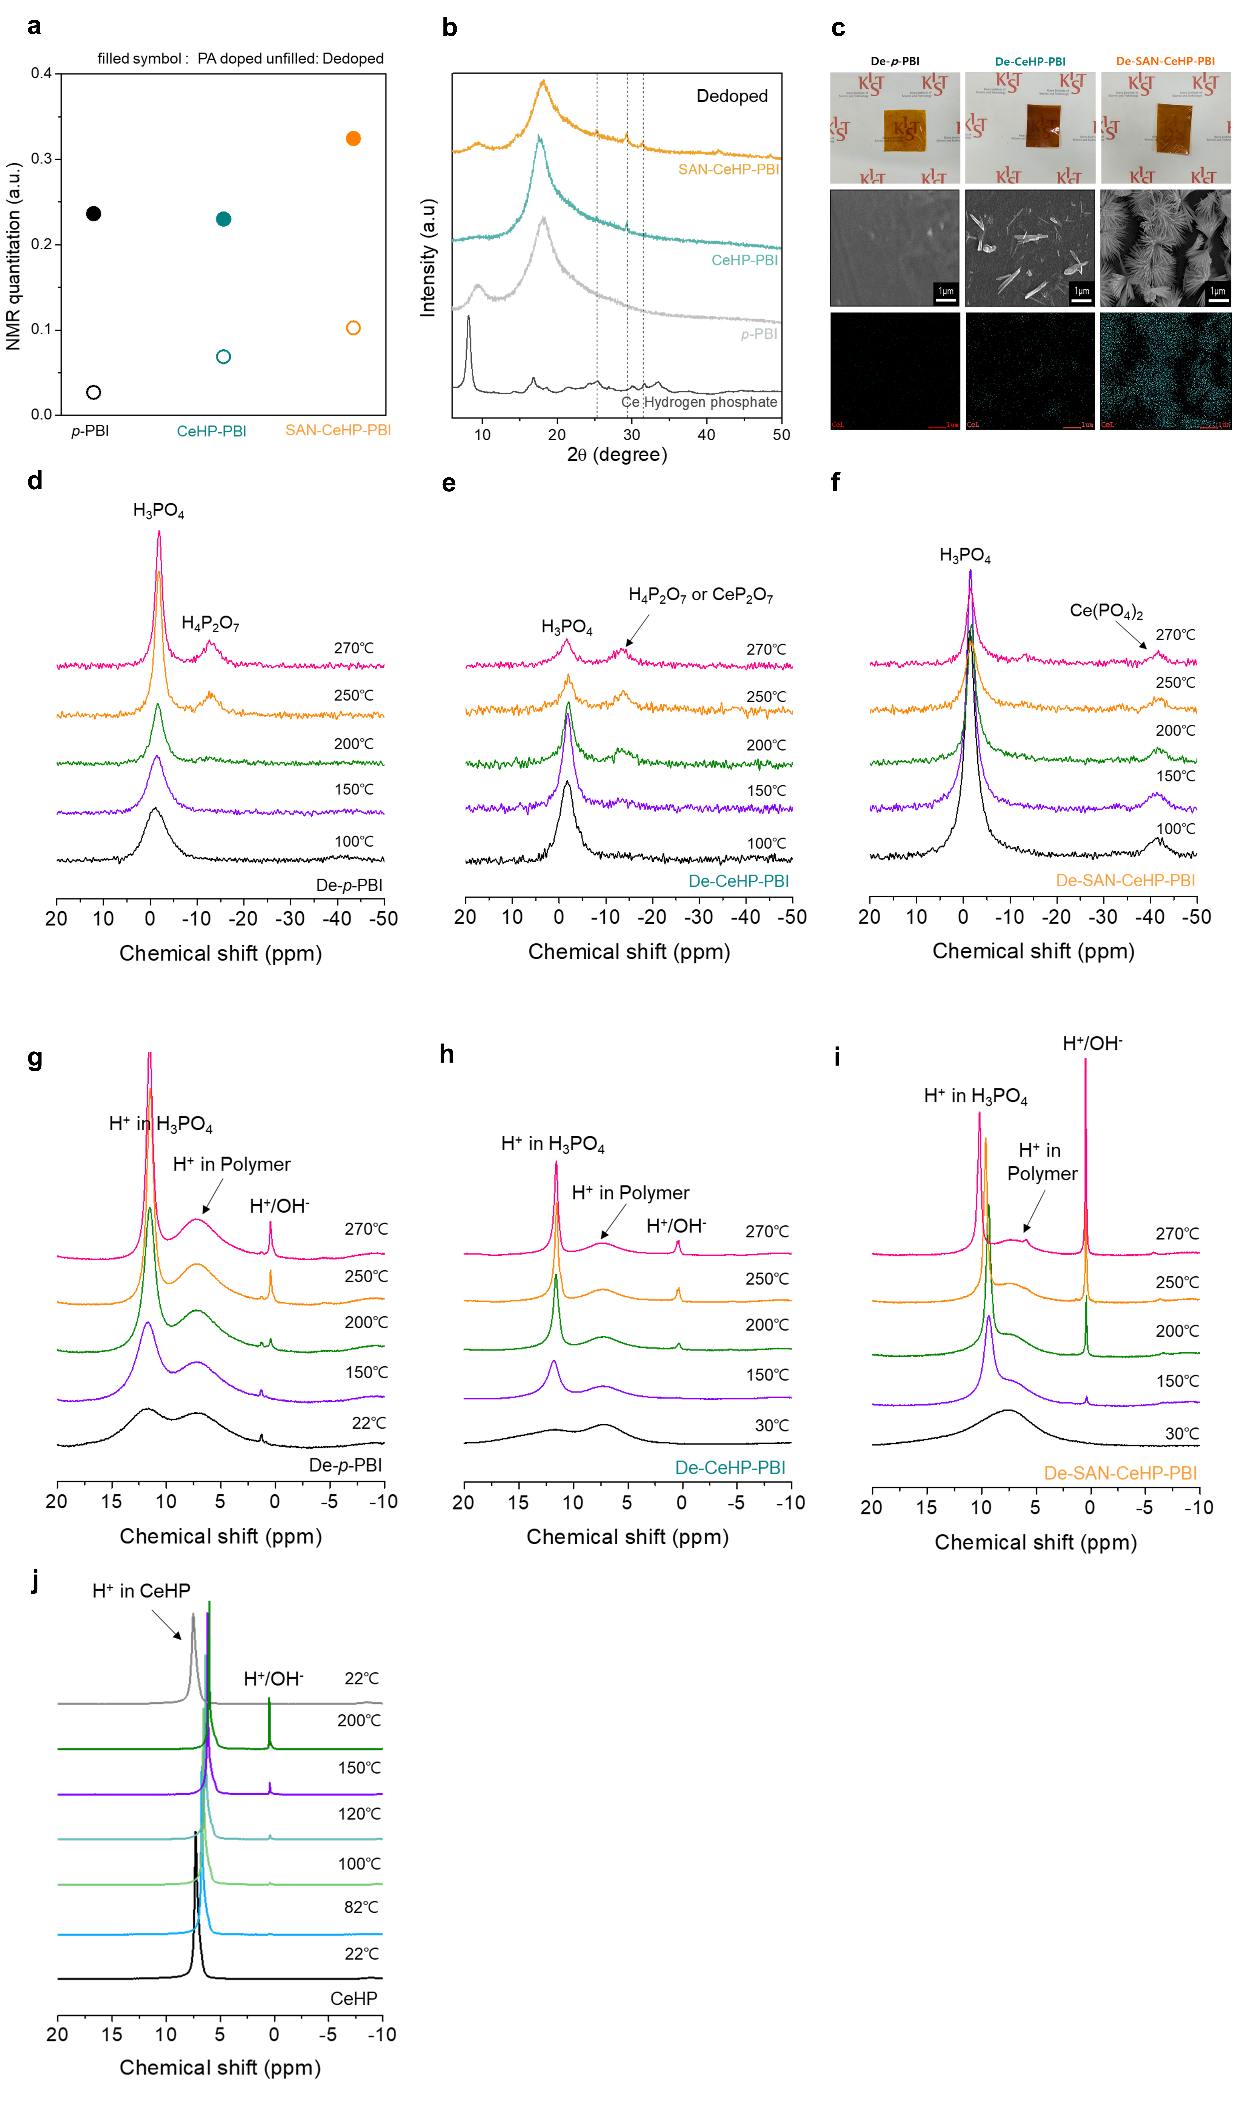
Extended Data Figure 7**

**Extended Data Figure 8**

**
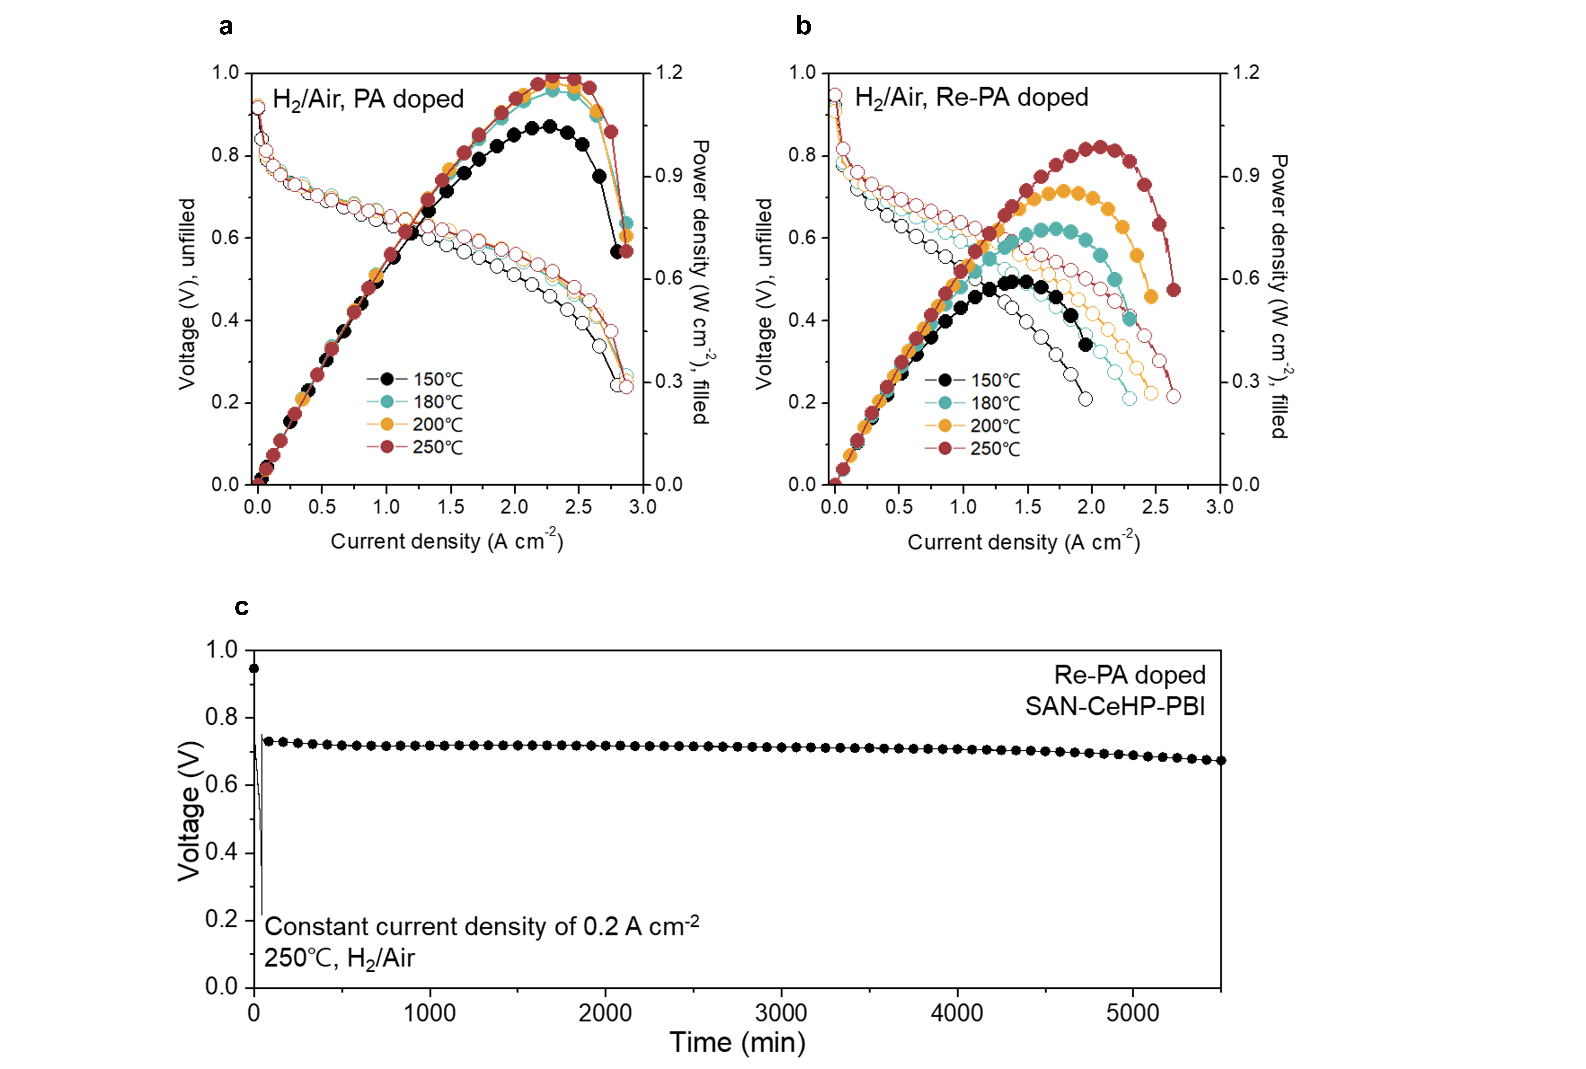
**

**Extended Data Figure 9**

**
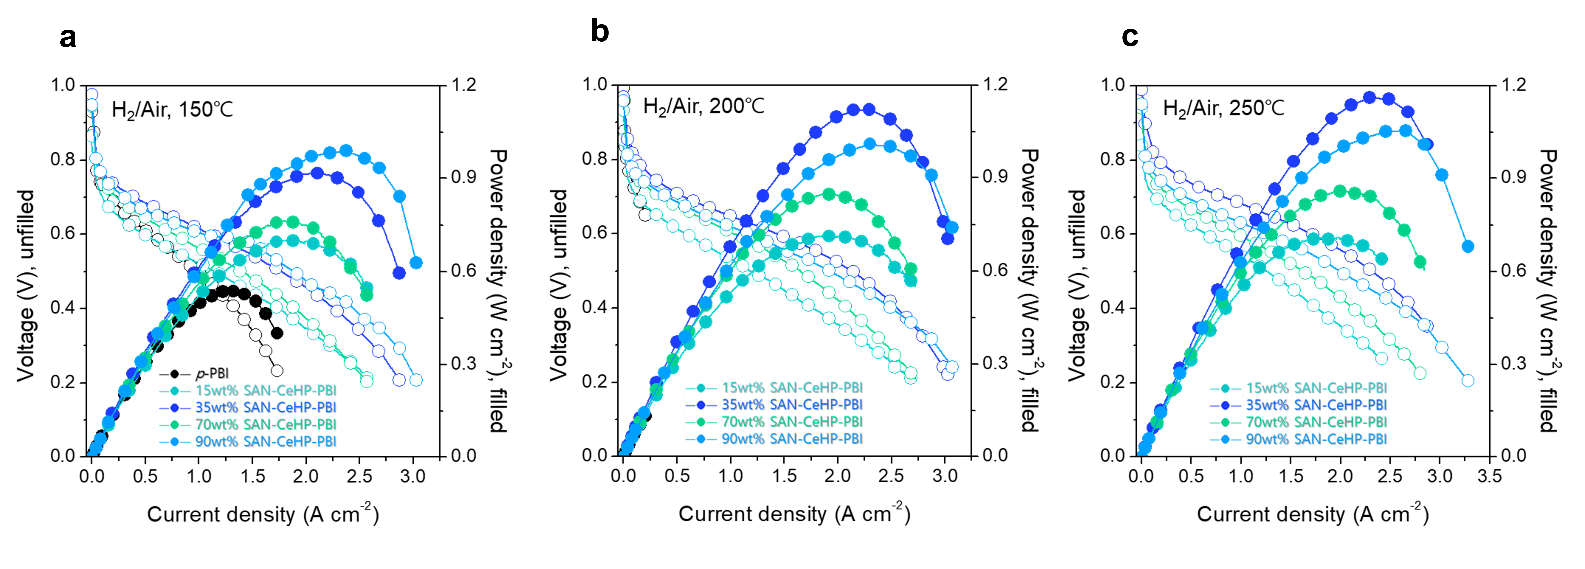
**

**Extended Data Figure 10**


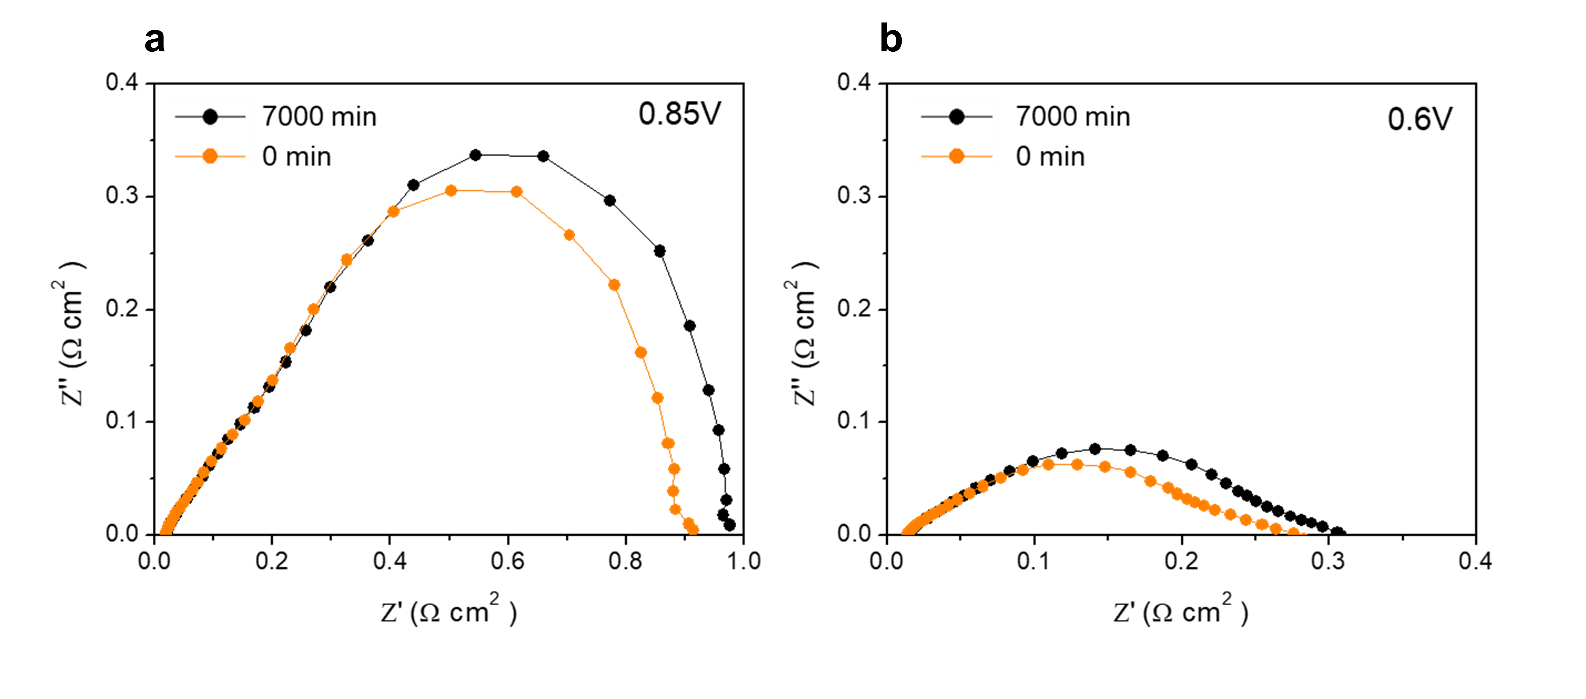


**Extended Data Figure 11**


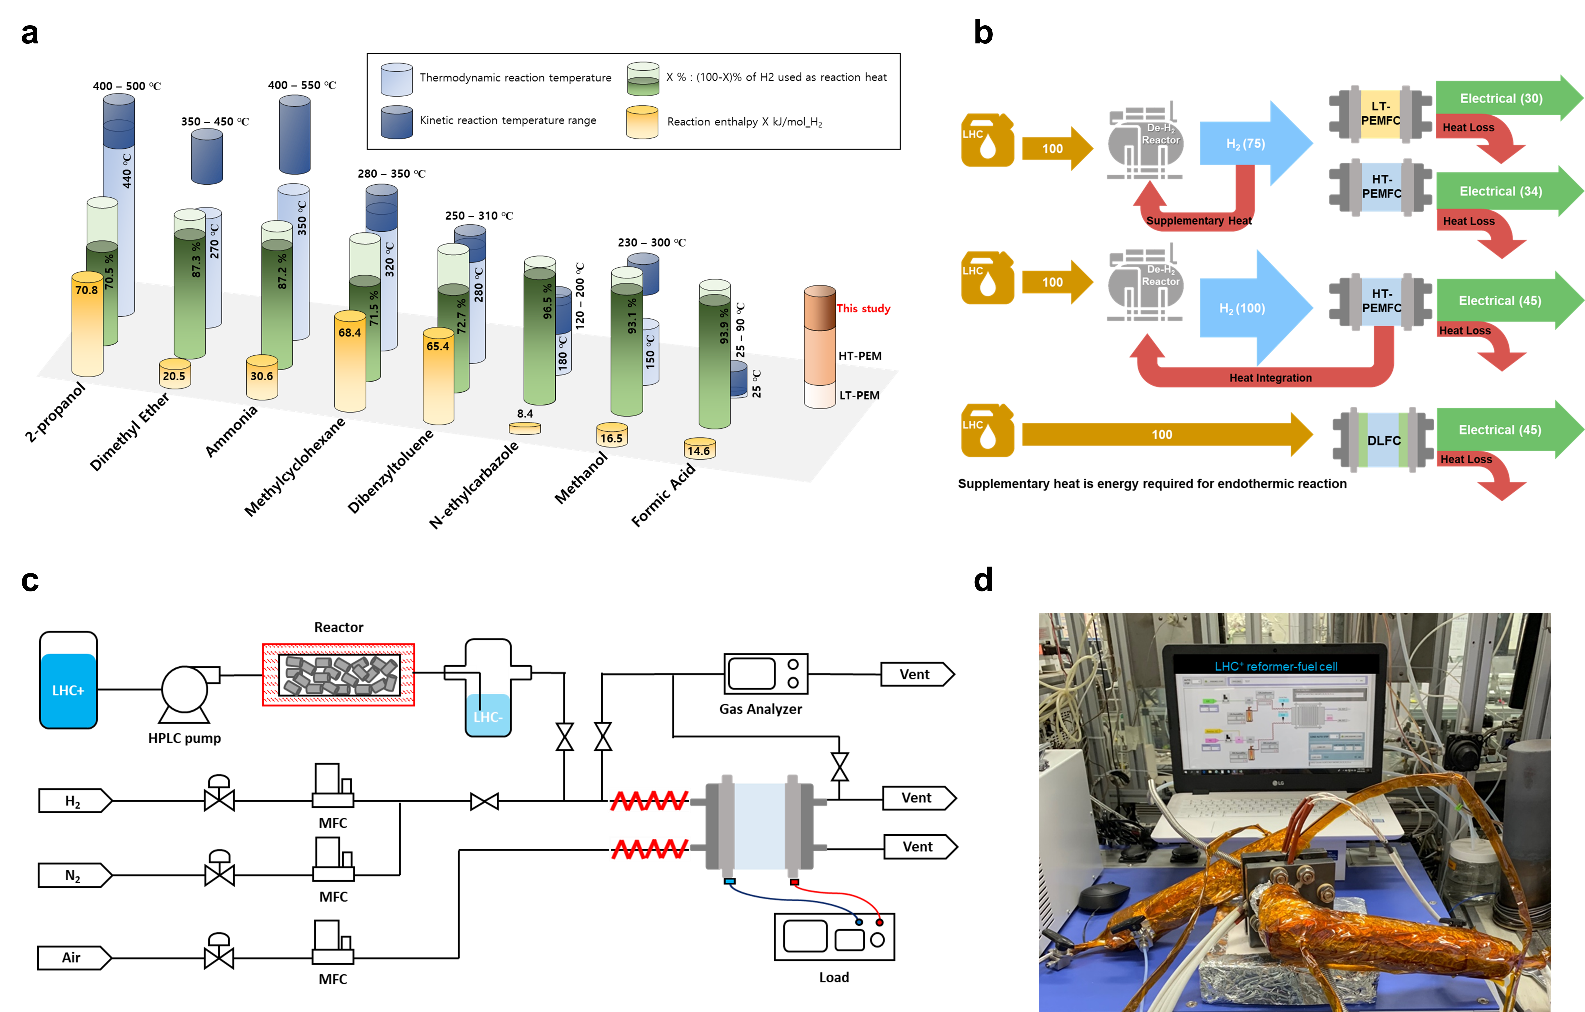

Supplement: Supplementary file 3 [file 51d8cec6950a3a25a5e49fd6.docx]
